# Supplementary material for: Tolerance with High Yield Potential Is Provided by Lower Na+ Ion Accumulation and Higher Photosynthetic Activity in Tolerant YNU31-2-4 Rice Genotype under Salinity and Multiple Heat and Salinity Stress
Source: MDPI journal article supplement (doi:10.3390/plants12091910), 2023-05-08
Supplement: s1 [file s1]

**Table S1.** Variance analysis tables.

| 1000-Grain Weight (TG) |    |        |         |         |              |
|------------------------|----|--------|---------|---------|--------------|
|                        | Df | Sum Sq | Mean Sq | F value | Pr (>F)      |
| G                      | 2  | 219.8  | 109.88  | 262.2   | < 2e-16 ***  |
| E                      | 5  | 388.4  | 77.69   | 262.2   | < 2e-16 ***  |
| G x E                  | 10 | 47.8   | 4.78    | 11.4    | 1.83E-08 *** |
| Residuals              | 36 | 15.1   | 0.42    |         |              |

| The Net Photosynthesis Ratio (An) |    |        |         |         |          |     |
|-----------------------------------|----|--------|---------|---------|----------|-----|
|                                   | Df | Sum Sq | Mean Sq | F value | Pr (>F)  |     |
| G                                 | 2  | 67     | 33.6    | 6.27    | 0.00461  | **  |
| E                                 | 5  | 1069   | 213.9   | 39.9    | 1.04E-13 | *** |
| G x E                             | 10 | 5331   | 533.1   | 99.47   | < 2e-16  | *** |
| Residuals                         | 36 | 193    | 5.4     |         |          |     |

|           | Df | Sum Sq | Mean Sq | F value | Pr (>F)  |     |
|-----------|----|--------|---------|---------|----------|-----|
| G         | 2  | 50578  | 27539   | 63.02   | 1.74E-12 | *** |
| E         | 5  | 568277 | 113655  | 260.08  | < 2e-16  | *** |
| G x E     | 10 | 375582 | 37558   | 85.94   | < 2e-16  | *** |
| Residuals | 36 | 15732  | 437     |         |          |     |

|           | Df | Sum Sq | Mean Sq | F value | Pr (>F)  |     |
|-----------|----|--------|---------|---------|----------|-----|
| G         | 2  | 510.1  | 255.05  | 108.25  | 5.92E-16 | *** |
| E         | 5  | 1056.9 | 211.38  | 89.72   | < 2e-16  | *** |
| G x E     | 10 | 2033.5 | 203.35  | 86.31   | < 2e-16  | *** |
| Residuals | 36 | 84.8   | 2.36    |         |          |     |

| Chalky Grain (CG) |    |        |         |         |              |
|-------------------|----|--------|---------|---------|--------------|
|                   | Df | Sum Sq | Mean Sq | F value | Pr (>F)      |
| G                 | 2  | 3557   | 1778.6  | 53.65   | 1.59E-11 *** |
| E                 | 5  | 4540   | 908     | 27.39   | 2.46E-11 *** |
| G x E             | 10 | 7218   | 721.8   | 21.77   | 2.23E-12 *** |
| Residuals         | 36 | 1193   | 33.2    |         |              |

| Chlorophyll a (Chla) Content |    |        |         |         |              |
|------------------------------|----|--------|---------|---------|--------------|
|                              | Df | Sum Sq | Mean Sq | F value | Pr (>F)      |
| G                            | 2  | 11758  | 5879    | 98.61   | 2.48E-15 *** |
| E                            | 5  | 29542  | 5908    | 99.1    | < 2e-16 ***  |
| G x E                        | 10 | 15180  | 1518    | 25.46   | 2.09E-13 *** |
| Residuals                    | 36 | 2146   | 60      |         |              |

| <b>Chlorophyll b (Chlb) Content</b> |    |        |         |         |          |     |
|-------------------------------------|----|--------|---------|---------|----------|-----|
|                                     | Df | Sum Sq | Mean Sq | F value | Pr (>F)  |     |
| G                                   | 2  | 34009  | 17004   | 49.95   | 4.12E-11 | *** |
| E                                   | 5  | 149365 | 29873   | 87.76   | < 2e-16  | *** |
| G x E                               | 10 | 55823  | 5582    | 16.4    | 1.36E-10 | *** |
| Residuals                           | 36 | 12255  | 340     |         |          |     |

| Total Chlorophyll (ChlT) Content |    |        |         |         |          |     |
|----------------------------------|----|--------|---------|---------|----------|-----|
|                                  | Df | Sum Sq | Mean Sq | F value | Pr (>F)  |     |
| G                                | 2  | 25595  | 12798   | 49.36   | 4.82E-11 | *** |
| E                                | 5  | 112905 | 22581   | 87.1    | < 2e-16  | *** |
| G x E                            | 10 | 42166  | 4217    | 16.26   | 1.53E-10 | *** |
| Residuals                        | 36 | 9333   | 259     |         |          |     |

| The intercellular CO <sub>2</sub> concentration (Ci) |    |        |         |         |          |     |
|------------------------------------------------------|----|--------|---------|---------|----------|-----|
|                                                      | Df | Sum Sq | Mean Sq | F value | Pr (>F)  |     |
| G                                                    | 2  | 3096   | 1548    | 8.922   | 7.13E-04 | *** |
| E                                                    | 5  | 283030 | 56606   | 326.264 | < 2e-16  | *** |
| G x E                                                | 10 | 41519  | 4152    | 23.931  | 5.39E-13 | *** |
| Residuals                                            | 36 | 6246   | 173     |         |          |     |

| The ratio of intercellular to ambient CO2 concentration (Ci/Ca) |    |        |         |         |          |     |
|-----------------------------------------------------------------|----|--------|---------|---------|----------|-----|
|                                                                 | Df | Sum Sq | Mean Sq | F value | Pr (>F)  |     |
| G                                                               | 2  | 2.1615 | 0.0807  | 68.77   | 5.06E-13 | *** |
| E                                                               | 5  | 2.0818 | 0.4164  | 354.65  | < 2e-16  | *** |
| G x E                                                           | 10 | 0.4286 | 0.0429  | 36.51   | 7.34E-16 | *** |
| Residuals                                                       | 36 | 0.0423 | 0.0012  |         |          |     |

ns: non-significant; \*\*significant at  $P < 0.005$ ; \*\*\*significant at  $P < 0.001$ .

| Transpiration Rate (E) |    |          |          |         |          |     |
|------------------------|----|----------|----------|---------|----------|-----|
|                        | Df | Sum Sq   | Mean Sq  | F value | Pr (>F)  |     |
| G                      | 2  | 6.40E-07 | 3.20E-07 | 0.779   | 4.67E-01 | ns  |
| E                      | 5  | 2.65E-04 | 5.31E-05 | 129.182 | < 2e-16  | *** |
| G x E                  | 10 | 4.79E-05 | 4.79E-06 | 11.667  | 1.35E-08 | *** |
| Residuals              | 36 | 1.48E-05 | 4.10E-07 |         |          |     |

| Flag Leaf Area (FLA) |    |        |         |         |              |
|----------------------|----|--------|---------|---------|--------------|
|                      | Df | Sum Sq | Mean Sq | F value | Pr(>F)       |
| G                    | 2  | 2363   | 1181.4  | 109.53  | 4.94E-16 *** |
| E                    | 5  | 5574   | 1114.8  | 103.35  | < 2e-16 ***  |
| G x E                | 10 | 1307   | 130.7   | 12.11   | 8.32E-09 *** |
| Residuals            | 36 | 388    | 10.8    |         |              |

| Grain Length (GL) |    |        |         |         |              |
|-------------------|----|--------|---------|---------|--------------|
|                   | Df | Sum Sq | Mean Sq | F value | Pr(>F)       |
| G                 | 2  | 8.106  | 4.053   | 184     | < 2e-16 ***  |
| E                 | 5  | 2.0207 | 0.4041  | 183.48  | < 2e-16 ***  |
| G x E             | 10 | 0.5038 | 0.0504  | 22.87   | 1.07E-12 *** |
| Residuals         | 36 | 0.0793 | 0.0022  |         |              |

| Grain Number Per Panicle (GNPP) |    |        |          |         |            |
|---------------------------------|----|--------|----------|---------|------------|
|                                 | Df | Sum Sq | Mean Sq  | F value | Pr(>F)     |
| G                               | 2  | 3122   | 1.56E+03 | 65.39   | <2e-16 *** |
| E                               | 5  | 67960  | 1.36E+04 | 569.33  | <2e-16 *** |
| G x E                           | 10 | 4604   | 4.60E+02 | 19.29   | <2e-16 *** |
| Residuals                       | 72 | 1719   | 2.40E+01 |         |            |

| Stomatal Conductance (Gs) |    |        |         |         |          |     |
|---------------------------|----|--------|---------|---------|----------|-----|
|                           | Df | Sum Sq | Mean Sq | F value | Pr (>F)  |     |
| G                         | 2  | 0.0279 | 0.01397 | 19.63   | 1.72E-06 | *** |
| E                         | 5  | 0.8301 | 0.16602 | 233.24  | < 2e-16  | *** |
| G x E                     | 10 | 0.3914 | 0.03914 | 54.99   | < 2e-16  | *** |
| Residuals                 | 36 | 0.0256 | 0.00071 |         |          |     |

| Grain Thickness (GT) |    |         |         |         |              |
|----------------------|----|---------|---------|---------|--------------|
|                      | Df | Sum Sq  | Mean Sq | F value | Pr(>F)       |
| G                    | 2  | 0.27583 | 0.13791 | 259.49  | < 2e-16 ***  |
| E                    | 5  | 0.25343 | 0.05069 | 95.37   | < 2e-16 ***  |
| G x E                | 10 | 0.06153 | 0.00615 | 11.58   | 1.50E-08 *** |
| Residuals            | 36 | 0.01913 | 0.00053 |         |              |

| Glucose Content |    |        |         |         |              |
|-----------------|----|--------|---------|---------|--------------|
|                 | Df | Sum Sq | Mean Sq | F value | Pr (>F)      |
| G               | 2  | 841    | 420     | 17.9    | 4.01E-06 *** |
| E               | 5  | 72487  | 14497   | 617.32  | <2e-16 ***   |
| G x E           | 10 | 10406  | 1041    | 44.31   | <2e-16 ***   |
| Residuals       | 36 | 845    | 23      |         |              |

| Grain Width (GW) | Df | Sum Sq | Mean Sq | F value | Pr(>F)   |     |
|------------------|----|--------|---------|---------|----------|-----|
| G                | 2  | 1.1248 | 0.5624  | 448.6   | < 2e-16  | *** |
| E                | 5  | 1.1988 | 0.2398  | 191.25  | < 2e-16  | *** |
| G x E            | 10 | 0.2893 | 0.0289  | 23.08   | 9.32E-13 | *** |
| Residuals        | 36 | 0.0451 | 0.0013  |         |          |     |

|           | K <sup>+</sup> content – Root (KR) |        |         |         |          |     |
|-----------|------------------------------------|--------|---------|---------|----------|-----|
|           | Df                                 | Sum Sq | Mean Sq | F value | Pr (>F)  |     |
| G         | 2                                  | 3363   | 1681    | 77.5    | 9.01E-14 | *** |
| E         | 5                                  | 45777  | 9155    | 422     | < 2e-16  | *** |
| G x E     | 10                                 | 19116  | 1912    | 88.11   | < 2e-16  | *** |
| Residuals | 36                                 | 781    | 22      |         |          |     |

|           | K <sup>+</sup> content – Shoot (KS) |        |         |         |          |     |
|-----------|-------------------------------------|--------|---------|---------|----------|-----|
|           | Df                                  | Sum Sq | Mean Sq | F value | Pr (>F)  |     |
| G         | 2                                   | 23669  | 11835   | 146.77  | < 2e-16  | *** |
| E         | 5                                   | 163193 | 32639   | 404.77  | < 2e-16  | *** |
| G x E     | 10                                  | 30947  | 3095    | 38.38   | 3.28E-16 | *** |
| Residuals | 36                                  | 2903   | 81      |         |          |     |

---

| Malondialdehyde (MDA) Content |    |        |         |         |          |     |
|-------------------------------|----|--------|---------|---------|----------|-----|
|                               | Df | Sum Sq | Mean Sq | F value | Pr (>F)  |     |
| G                             | 2  | 4.51   | 2.253   | 2.921   | 6.67E-02 | ns  |
| E                             | 5  | 80.44  | 16.089  | 20.859  | 9.73E-10 | *** |
| G x E                         | 10 | 105.07 | 10.507  | 13.623  | 1.76E-09 | *** |
| Residuals                     | 36 | 27.77  | 0.771   |         |          |     |

| Na <sup>+</sup> Content – Root (NaR) |    |        |         |         |          |     |
|--------------------------------------|----|--------|---------|---------|----------|-----|
|                                      | Df | Sum Sq | Mean Sq | F value | Pr (>F)  |     |
| G                                    | 2  | 2656   | 1328    | 92.48   | 6.55E-15 | *** |
| E                                    | 5  | 353347 | 70669   | 4920.4  | < 2e-16  | *** |
| G x E                                | 10 | 3847   | 385     | 26.78   | 9.62E-14 | *** |
| Residuals                            | 36 | 517    | 14      |         |          |     |

| Na <sup>+</sup> Content – Shoot (NaS) |    |        |         |         |         |     |
|---------------------------------------|----|--------|---------|---------|---------|-----|
|                                       | Df | Sum Sq | Mean Sq | F value | Pr (>F) |     |
| G                                     | 2  | 9286   | 4643    | 117.45  | <2e-16  | *** |
| E                                     | 5  | 449619 | 89924   | 2274.79 | <2e-16  | *** |
| G x E                                 | 10 | 22329  | 2233    | 56.48   | <2e-16  | *** |
| Residuals                             | 36 | 1423   | 40      |         |         |     |

| Na <sup>+</sup> /K <sup>+</sup> Ratio – Root (NaKR) |    |        |         |         |          |     |
|-----------------------------------------------------|----|--------|---------|---------|----------|-----|
|                                                     | Df | Sum Sq | Mean Sq | F value | Pr (>F)  |     |
| G                                                   | 2  | 14.99  | 7.496   | 62.63   | 1.89E-12 | *** |
| E                                                   | 5  | 94.7   | 18.94   | 158.26  | < 2e-16  | *** |
| G x E                                               | 10 | 40.93  | 4.093   | 34.2    | 2.08E-15 | *** |
| Residuals                                           | 36 | 4.31   | 0.12    |         |          |     |

| Na <sup>+</sup> /K <sup>+</sup> Ratio – Shoot (NaKS) |    |        |         |         |          |     |
|------------------------------------------------------|----|--------|---------|---------|----------|-----|
|                                                      | Df | Sum Sq | Mean Sq | F value | Pr (>F)  |     |
| G                                                    | 2  | 1.449  | 0.7247  | 95.48   | 4.04E-15 | *** |
| E                                                    | 5  | 13.974 | 2.7949  | 368.23  | < 2e-16  | *** |
| G x E                                                | 10 | 2.536  | 0.2536  | 33.41   | 3.02E-15 | *** |
| Residuals                                            | 36 | 0.273  | 0.0076  |         |          |     |

|           | Df | Sum Sq | Mean Sq | F value | Pr (>F) |     |
|-----------|----|--------|---------|---------|---------|-----|
| G         | 2  | 106.7  | 53.33   | 237.47  | <2e-16  | *** |
| E         | 5  | 603.4  | 120.69  | 537.37  | <2e-16  | *** |
| G x E     | 10 | 73.5   | 7.35    | 32.74   | <2e-16  | *** |
| Residuals | 72 | 16.2   | 0.22    |         |         |     |

| Panicle Number (PN) |    |        |         |         |          |     |
|---------------------|----|--------|---------|---------|----------|-----|
|                     | Df | Sum Sq | Mean Sq | F value | Pr (>F)  |     |
| G                   | 2  | 273.4  | 136.7   | 31.42   | 1.55E-10 | *** |
| E                   | 5  | 3131.4 | 626.3   | 143.97  | < 2e-16  | *** |
| G x E               | 10 | 45.4   | 4.54    | 10.44   | 1.19E-10 | *** |
| Residuals           | 72 | 313.2  | 4.4     |         |          |     |

| Perfect Grain (PG) |    |        |         |         |              |
|--------------------|----|--------|---------|---------|--------------|
|                    | Df | Sum Sq | Mean Sq | F value | Pr (>F)      |
| G                  | 2  | 672    | 336.2   | 26.45   | 8.56E-08 *** |
| E                  | 5  | 9964   | 1992.9  | 156.8   | < 2e-16 ***  |
| G x E              | 10 | 4883   | 488.3   | 38.42   | 3.23E-16 *** |
| Residuals          | 72 | 458    | 12.7    |         |              |

| Plant Biomass (PB) |    |        |         |         |            |
|--------------------|----|--------|---------|---------|------------|
|                    | Df | Sum Sq | Mean Sq | F value | Pr(>F)     |
| G                  | 2  | 16302  | 8151    | 448.2   | <2e-16 *** |
| E                  | 5  | 96889  | 19378   | 1065.51 | <2e-16 *** |
| G x E              | 10 | 10622  | 1062    | 58.41   | <2e-16 *** |
| Residuals          | 72 | 1309   | 18      |         |            |

| Plant Height (PH) |    |        |         |         |              |
|-------------------|----|--------|---------|---------|--------------|
|                   | Df | Sum Sq | Mean Sq | F value | Pr(>F)       |
| G                 | 2  | 6615   | 3308    | 205.89  | < 2e-16 ***  |
| E                 | 5  | 7615   | 1523    | 94.81   | < 2e-16 ***  |
| G x E             | 10 | 1733   | 173     | 10.79   | 6.18E-11 *** |
| Residuals         | 72 | 1157   | 16      |         |              |

ns: non-significant; \*\*significant at  $P < 0.005$ ; \*\*\*significant at  $P < 0.001$ .

| Proline (PRO) Content |    |        |         |         |          |     |
|-----------------------|----|--------|---------|---------|----------|-----|
|                       | Df | Sum Sq | Mean Sq | F value | Pr (>F)  |     |
| G                     | 2  | 0.897  | 0.449   | 39.1    | 9.44E-10 | *** |
| E                     | 5  | 20.282 | 4.056   | 353.5   | < 2e-16  | *** |
| G x E                 | 10 | 12.153 | 1.215   | 105.9   | < 2e-16  | *** |
| Residuals             | 36 | 0.413  | 0.011   |         |          |     |

|           | Df | Sum Sq  | Mean Sq | F value | Pr (>F)  |     |
|-----------|----|---------|---------|---------|----------|-----|
| G         | 2  | 740748  | 370374  | 47.75   | 7.47E-11 | *** |
| E         | 5  | 1703113 | 340623  | 43.91   | 2.45E-14 | *** |
| G x E     | 10 | 1683197 | 168320  | 21.7    | 2.35E-12 | *** |
| Residuals | 36 | 279255  | 7757    |         |          |     |

|           | Df | Sum Sq | Mean Sq | F value | Pr (>F)  |     |
|-----------|----|--------|---------|---------|----------|-----|
| G         | 2  | 655.2  | 327.6   | 115.909 | < 2e-16  | *** |
| E         | 5  | 2591.8 | 518.4   | 183.392 | < 2e-16  | *** |
| G x E     | 10 | 115.4  | 11.5    | 4.082   | 1.81E-04 | *** |
| Residuals | 72 | 203.5  | 2.8     |         |          |     |

|           | Df | Sum Sq | Mean Sq | F value | Pr (>F)  |     |
|-----------|----|--------|---------|---------|----------|-----|
| G         | 2  | 802.2  | 401.1   | 94.2    | < 2e-16  | *** |
| E         | 5  | 1137   | 227.4   | 53.41   | < 2e-16  | *** |
| G x E     | 10 | 399.8  | 40      | 9.39    | 9.08E-10 | *** |
| Residuals | 72 | 306.6  | 4.3     |         |          |     |

|           | Df | Sum Sq | Mean Sq | F value | Pr(>F)   |     |
|-----------|----|--------|---------|---------|----------|-----|
| G         | 2  | 610    | 305     | 9.165   | 6.06E-04 | *** |
| E         | 5  | 2494   | 498.8   | 14.99   | 5.82E-08 | *** |
| G x E     | 10 | 599.1  | 59.9    | 1.8     | 9.61E-02 | ns  |
| Residuals | 72 | 1197.9 | 33.3    |         |          |     |

|           | Df | Sum Sq | Mean Sq | F value | Pr (>F) |     |
|-----------|----|--------|---------|---------|---------|-----|
| G         | 2  | 1513   | 756.6   | 145.6   | <2e-16  | *** |
| E         | 5  | 4858   | 971.6   | 187     | <2e-16  | *** |
| G x E     | 10 | 5493   | 549.3   | 105.7   | <2e-16  | ns  |
| Residuals | 72 | 187    | 5.2     |         |         |     |

|           | Df | Sum Sq | Mean Sq | F value | Pr(>F)   |     |
|-----------|----|--------|---------|---------|----------|-----|
| G         | 2  | 1502   | 751     | 21.492  | 4.80E-08 | *** |
| E         | 5  | 32859  | 6572    | 188.06  | < 2e-16  | *** |
| G x E     | 10 | 2619   | 262     | 7.495   | 4.82E-08 | *** |
| Residuals | 72 | 2516   | 35      |         |          |     |

| Water Use Efficiency (WUE) |    |           |          |         |          |     |
|----------------------------|----|-----------|----------|---------|----------|-----|
|                            | Df | Sum Sq    | Mean Sq  | F value | Pr (>F)  |     |
| G                          | 2  | 6815402   | 3407701  | 3.832   | 3.10E-02 | *   |
| E                          | 5  | 261016322 | 52203264 | 58.699  | 2.65E-16 | *** |
| G x E                      | 10 | 39487541  | 3948754  | 4.44    | 4.25E-04 | *** |
| Residuals                  | 36 | 32015942  | 889332   |         |          |     |

| Yield Per Plant (YPP) |    |        |         |         |            |
|-----------------------|----|--------|---------|---------|------------|
|                       | Df | Sum Sq | Mean Sq | F value | Pr (>F)    |
| G                     | 2  | 962    | 481     | 89.31   | <2e-16 *** |
| E                     | 5  | 22195  | 4439    | 824.56  | <2e-16 *** |
| G x E                 | 10 | 1669   | 167     | 31      | <2e-16 *** |
| Residuals             | 72 | 388    | 5       |         |            |
