# Supplementary material for: Tolerance with High Yield Potential Is Provided by Lower Na+ Ion Accumulation and Higher Photosynthetic Activity in Tolerant YNU31-2-4 Rice Genotype under Salinity and Multiple Heat and Salinity Stress
Source: MDPI journal article supplement (doi:10.3390/plants12091910), 2023-05-08
Supplement: s1 [file s1]

**Table S2.** Loading values and percentage contribution of variables on the axis identified by the principal component analysis (PCA) for all cultivars under control and saline conditions.

| Variable        | Dim. 1         |                              |                           | Dim. 2         |                              |                           | Dim. 3         |                              |                           |
|-----------------|----------------|------------------------------|---------------------------|----------------|------------------------------|---------------------------|----------------|------------------------------|---------------------------|
|                 | Loading values | Contribution of variable (%) | Quality of representation | Loading values | Contribution of variable (%) | Quality of representation | Loading values | Contribution of variable (%) | Quality of representation |
| An              | 0.14           | 0.099                        | 0.02                      | 0.62           | 9.906                        | 0.384                     | -0.009         | 0.003                        | 0                         |
| Gs              | 0.553          | 1.541                        | 0.305                     | 0.532          | 7.302                        | 0.283                     | -0.347         | 4.573                        | 0.121                     |
| Ci              | 0.712          | 2.561                        | 0.507                     | 0.38           | 3.727                        | 0.145                     | -0.258         | 2.524                        | 0.067                     |
| E               | 0.77           | 2.994                        | 0.593                     | 0.153          | 0.6                          | 0.023                     | -0.186         | 1.319                        | 0.035                     |
| Ci.Ca           | 0.636          | 2.043                        | 0.405                     | 0.257          | 1.698                        | 0.066                     | -0.627         | 14.892                       | 0.393                     |
| WUE             | -0.802         | 3.244                        | 0.643                     | 0.084          | 0.181                        | 0.007                     | 0.105          | 0.42                         | 0.011                     |
| RWC             | 0.804          | 3.26                         | 0.646                     | 0.108          | 0.3                          | 0.012                     | -0.032         | 0.039                        | 0.001                     |
| Chla            | 0.831          | 3.482                        | 0.69                      | 0.238          | 1.464                        | 0.057                     | 0.141          | 0.758                        | 0.02                      |
| Chlb            | 0.881          | 3.922                        | 0.777                     | -0.116         | 0.348                        | 0.013                     | 0.096          | 0.351                        | 0.009                     |
| ChlT            | 0.891          | 4.009                        | 0.794                     | -0.071         | 0.129                        | 0.005                     | 0.093          | 0.331                        | 0.009                     |
| PROT            | 0.703          | 2.498                        | 0.495                     | -0.2           | 1.028                        | 0.04                      | 0.234          | 2.072                        | 0.055                     |
| MDA             | 0.051          | 0.013                        | 0.003                     | 0.072          | 0.133                        | 0.005                     | -0.043         | 0.072                        | 0.002                     |
| PRO             | -0.556         | 1.561                        | 0.309                     | -0.222         | 1.274                        | 0.049                     | -0.141         | 0.758                        | 0.02                      |
| CAT             | 0.039          | 0.008                        | 0.002                     | 0.328          | 2.769                        | 0.107                     | 0.278          | 2.931                        | 0.077                     |
| SOD             | -0.211         | 0.226                        | 0.045                     | -0.513         | 6.77                         | 0.263                     | -0.364         | 5.012                        | 0.132                     |
| APX             | -0.073         | 0.027                        | 0.005                     | -0.589         | 8.95                         | 0.347                     | 0.048          | 0.086                        | 0.002                     |
| NaS             | -0.866         | 3.79                         | 0.751                     | -0.382         | 3.754                        | 0.146                     | 0.144          | 0.788                        | 0.021                     |
| NaR             | -0.91          | 4.177                        | 0.827                     | -0.277         | 1.974                        | 0.077                     | -0.051         | 0.098                        | 0.003                     |
| KS              | -0.593         | 1.778                        | 0.352                     | -0.228         | 1.335                        | 0.052                     | 0.514          | 10.008                       | 0.264                     |
| KR              | 0.056          | 0.016                        | 0.003                     | 0.493          | 6.257                        | 0.243                     | 0.501          | 9.529                        | 0.251                     |
| NaKS            | -0.766         | 2.965                        | 0.587                     | -0.092         | 0.216                        | 0.008                     | -0.053         | 0.106                        | 0.003                     |
| NaKR            | -0.606         | 1.852                        | 0.367                     | -0.455         | 5.326                        | 0.207                     | -0.019         | 0.013                        | 0                         |
| PH              | 0.776          | 3.039                        | 0.602                     | -0.418         | 4.507                        | 0.175                     | 0.321          | 3.906                        | 0.103                     |
| PB              | 0.94           | 4.462                        | 0.884                     | -0.212         | 1.155                        | 0.045                     | -0.051         | 0.1                          | 0.003                     |
| RL              | 0.741          | 2.774                        | 0.549                     | 0.019          | 0.01                         | 0                         | 0.203          | 1.57                         | 0.041                     |
| RB              | 0.867          | 3.792                        | 0.751                     | -0.381         | 3.737                        | 0.145                     | -0.017         | 0.011                        | 0                         |
| PN              | 0.763          | 2.943                        | 0.583                     | 0.494          | 6.294                        | 0.244                     | 0.029          | 0.033                        | 0.001                     |
| PL              | 0.921          | 4.279                        | 0.848                     | -0.296         | 2.263                        | 0.088                     | 0.003          | 0                            | 0                         |
| FLA             | 0.845          | 3.608                        | 0.715                     | -0.404         | 4.216                        | 0.164                     | 0.122          | 0.563                        | 0.015                     |
| GNPP            | 0.899          | 4.078                        | 0.808                     | -0.306         | 2.408                        | 0.093                     | -0.172         | 1.125                        | 0.03                      |
| SN              | 0.794          | 3.18                         | 0.63                      | -0.453         | 5.3                          | 0.206                     | -0.204         | 1.583                        | 0.042                     |
| TGW             | 0.922          | 4.291                        | 0.85                      | -0.098         | 0.249                        | 0.01                      | 0.181          | 1.239                        | 0.033                     |
| YPP             | 0.928          | 4.352                        | 0.862                     | -0.229         | 1.347                        | 0.052                     | -0.156         | 0.925                        | 0.024                     |
| PG              | 0.522          | 1.376                        | 0.273                     | -0.027         | 0.019                        | 0.001                     | -0.476         | 8.581                        | 0.226                     |
| CG              | 0.092          | 0.043                        | 0.009                     | 0.308          | 2.446                        | 0.095                     | 0.535          | 10.846                       | 0.286                     |
| GL              | 0.933          | 4.395                        | 0.871                     | -0.117         | 0.352                        | 0.014                     | 0.101          | 0.384                        | 0.01                      |
| GW              | 0.891          | 4.009                        | 0.794                     | -0.056         | 0.081                        | 0.003                     | 0.288          | 3.148                        | 0.083                     |
| GT              | 0.81           | 3.313                        | 0.656                     | -0.083         | 0.177                        | 0.007                     | 0.495          | 9.304                        | 0.245                     |
| Eigen value     |                | 19.807                       |                           |                | 3.88                         |                           |                | 2.637                        |                           |
| Variability (%) |                | 52.124                       |                           |                | 10.211                       |                           |                | 6.94                         |                           |
| Cumulative (%)  |                | 52.124                       |                           |                | 62.335                       |                           |                | 69.275                       |                           |
