# Supplementary figures and images for: Tolerance with High Yield Potential Is Provided by Lower Na+ Ion Accumulation and Higher Photosynthetic Activity in Tolerant YNU31-2-4 Rice Genotype under Salinity and Multiple Heat and Salinity Stress
Source: MDPI journal article supplement (doi:10.3390/plants12091910), 2023-05-08

■ Control (26°C, 0 mM NaCl)    ■ Heat (31°C, 0 mM NaCl)  
■ Salinity (26°C, 75 mM NaCl)    ■ Heat + Salinity (31°C, 75 mM NaCl)

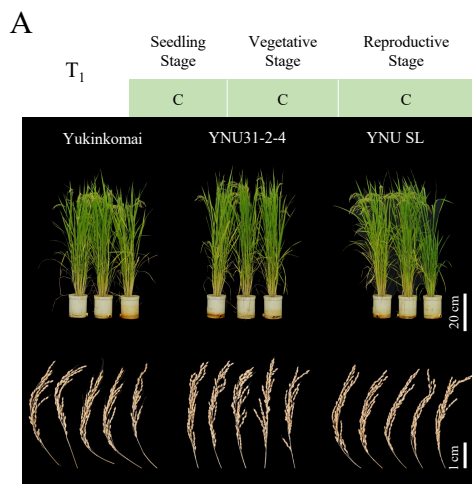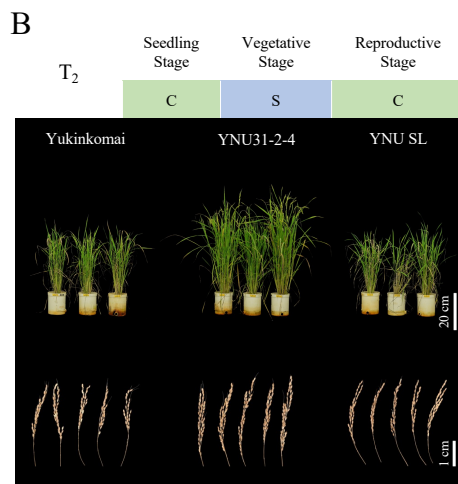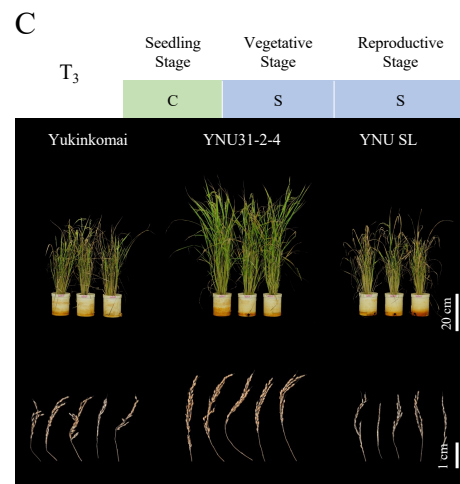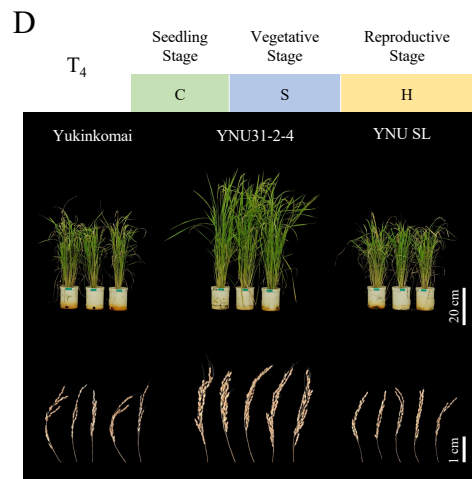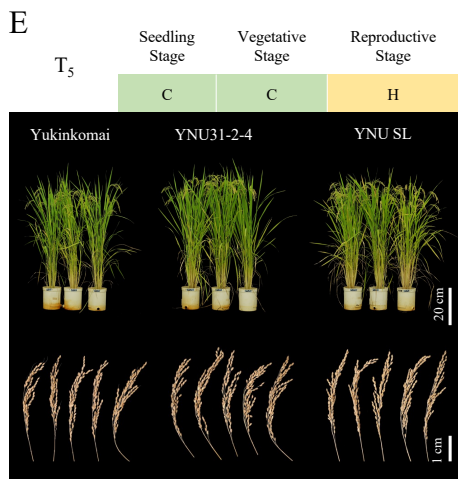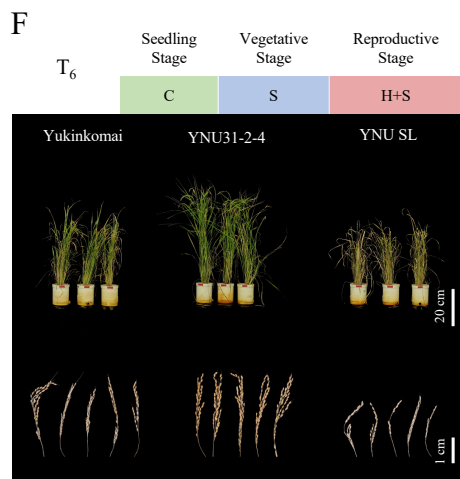

Supplement: s1 [file s1]
